# Supplementary material for: Anti-Salmonella Defence and Intestinal Homeostatic Maintenance In Vitro of a Consortium Containing Limosilactobacillus fermentum 3872 and Ligilactobacillus salivarius 7247 Strains in Human, Porcine, and Chicken Enterocytes
Source: MDPI journal article supplement (doi:10.3390/antibiotics13010030), 2023-12-28
Supplement: s1 [file s1]

## Supplementary Materials

**Table S1.** Primers used for qRT-PCR analysis of SE genes responsible for the intestinal colonization and virulence.

| Genes         | Function                              | Primer  | Sequence                     |
|---------------|---------------------------------------|---------|------------------------------|
| <i>sopB</i>   | Adherence                             | Forward | GCGTCAATTCATGGGCTAAC         |
|               |                                       | Reverse | GGCGGCGAACCCTATAAACT         |
| <i>invH</i>   | Invasion                              | Forward | CCCTTCCTCCGTGAGCAAA          |
|               |                                       | Reverse | TGGCCAGTTGCTCTTTCTGA         |
| <i>sipB</i>   | Type 3 secretion system               | Forward | GCCACTGCTGAATCTGATCCA        |
|               |                                       | Reverse | CGAGGCGCTTGCTGATTT           |
| <i>pipB</i>   | Type 3 secretion system               | Forward | GCTCCTGTTAATGATTTTCGCTAAAG   |
|               |                                       | Reverse | GCTCAGACTTAACTGACACCAAACTAA  |
| <i>orf245</i> | Type 3 secretion system               | Forward | CAGGTAATATCGATGTGGACTACA     |
|               |                                       | Reverse | GCGGTATGTGGAACGAGTTT         |
| <i>sipA</i>   | Type 3 secretion system               | Forward | CAGGGAACGGTGTGGAGGTA         |
|               |                                       | Reverse | AGACGTTTTTGGGTGTGATACGT      |
| <i>ssaV</i>   | Type 3 secretion system               | Forward | GCGCGATACGGACATATTCTG        |
|               |                                       | Reverse | TGGGCGCCACGTGAA              |
| <i>spvB</i>   | Survival in macrophages               | Forward | TGGGTGGGCAACAGCAA            |
|               |                                       | Reverse | GCAGGATGCCGTTACTGTCA         |
| <i>mgtC</i>   | Survival in macrophages               | Forward | CGAACCTCGCTTTCATCTTCTT       |
|               |                                       | Reverse | CCGCCGAGGGAGAAAAAC           |
| <i>sodC</i>   | Survival in macrophages               | Forward | CACATGGATCATGAGCGCTTT        |
|               |                                       | Reverse | CTGCGCCGCGTCTGA              |
| <i>tatA</i>   | Cell wall and cell membrane integrity | Forward | AGTATTTGGCAGTTGTTGATTGTTG-3' |
|               |                                       | Reverse | ACCGATGGAACCGAGTTTTTT-3'     |
| <i>hflK</i>   | Cell wall and cell membrane integrity | Forward | AGCGCGGCGTTGTGA              |
|               |                                       | Reverse | TCAGACCTGGCTCTACCAGATG       |
| <i>ompR</i>   | Cell wall and cell membrane integrity | Forward | TGTGCCGATCTTCTTCCA           |
|               |                                       | Reverse | CTCCATCGACGTCCAGATCTC        |
| <i>mrr1</i>   | Efflux pump regulator                 | Forward | CCATCGCTTCCAGCAACTG          |
|               |                                       | Reverse | TCTCTACCATGAACCCGTACAAATT    |
| <i>lrp</i>    | Virulence regulation                  | Forward | TTAATGCCGCCGTGCAA            |
|               |                                       | Reverse | GCCGGAACCAATGACACT           |
| <i>xthA</i>   | Exo/endonuclease activity             | Forward | CGCCCGTCCCCATCA              |
|               |                                       | Reverse | CACATCGGGCTGGTGTGTTT         |
| <i>rpoS</i>   | Oxidative stress                      | Forward | TTTTTCATCGGCCAGGATGT         |
|               |                                       | Reverse | 5'-CGCTGGGCGGTGATTC          |
| <i>ssrA</i>   | Metabolism                            | Forward | CGAGTATGGCTGGATCAAAACA       |
|               |                                       | Reverse | TGTACGTATTTTTGCGGGATGT       |
| <i>rfbH</i>   | Lipopolysaccharide biosynthesis       | Forward | ACGGTCGGTATTTGTCAACTCA       |
|               | Function                              | Reverse | TCGCCAACCGTATTTTGCTAA        |

**Table S2.** Human, porcine and chicken primers used for qRT-PCR analysis of host immune response.

| Primer                  | Sense primer              | Antisense primer          | Reference |
|-------------------------|---------------------------|---------------------------|-----------|
| Human TLR4              | TGCACAGGACAGAACATCTCTGGA  | AGCTCCTGCAGGGTATTCAAGTGT  | [106]     |
| Human TLR9              | GTGCCCCACTTCTCCATG        | GGCACAGTCATGATGTTGTTG     | [107]     |
| Human IAP               | CATACCTGGCTCTGTCCAAGA     | CGCTCCACCAACTAAGAACG      | [108]     |
| Human $\beta$ - actin   | TCACCCACACTGTGCCCATCTACGA | CAGCGGAACCGCTCATTGCCAATG  | [106]     |
| Porsine TLR4            | CTCTGCCTTCACTACAGAGA      | CTGAGTCGTCTCCAGAAGAT      | [109]     |
| Porsine TLR9            | GTGGAAGTGTTTTGGCATC       | CACAGCACTCTGAGCTTTGT      | [109]     |
| Porsine $\beta$ - actin | CATCACCATCGGCAACGA        | GCGTAGAGGTCCTTCCTGATGT    | [109]     |
| Chicken TLR4            | TGCACAGGACAGAACATCTCTGGA  | AGCTCCTGCAGGGTATTCAAGTGT  | [60]      |
| Chicken TLR21           | AGAAGGTGTCGGAGGATGGTG     | GGGCTCCAAATGCTGACTGC      | [60]      |
| Chicken $\beta$ -actin  | ACGTCTCACTGGATTTTCGAGCAGG | ACGTCTCACTGGATTTTCGAGCAGG | [60]      |
